# Supplementary material for: Porous CuO@C composite as high-performance anode materials for lithium-ion batteries
Source: Royal Society of Chemistry journal article supplement (doi:10.1039/d0dt02493g), 2020-01-01
Supplement: d0dt02493g1.pdf [file d0dt02493g1.pdf]

# Porous CuO@C composite as high-performance anode materials for lithium-ion batteries

Yang Xu,<sup>a,b</sup> Kainian Chu,<sup>a,b</sup> Zhiqiang Li,<sup>a,b</sup> Shikai Xu,<sup>a,b</sup> Ge Yao,<sup>a,b</sup> Ping Niu<sup>a,b</sup> and Fangcai Zheng<sup>\*a,b</sup>

<sup>a</sup> Institutes of Physical Science and Information Technology, Anhui University, Hefei, Anhui 230601, People's Republic of China

<sup>b</sup> Key Laboratory of Structure and Functional Regulation of Hybrid Materials, Anhui University, Ministry of Education, Hefei, Anhui 230601, People's Republic of China

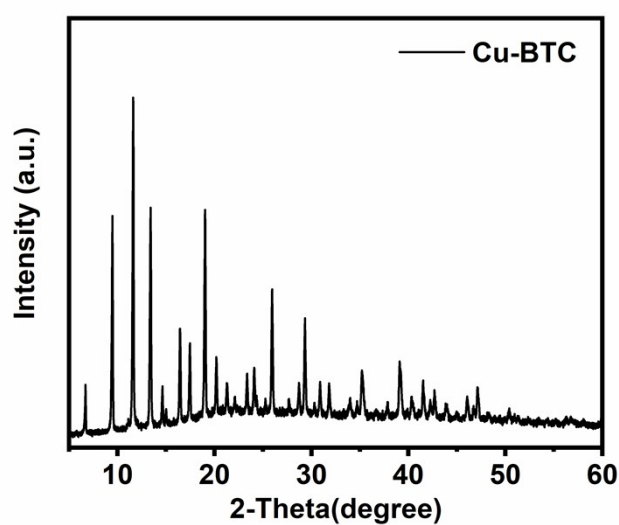

---

\* zfc@mail.ustc.edu.cn

Figure S1. XRD pattern of Cu-BTC.

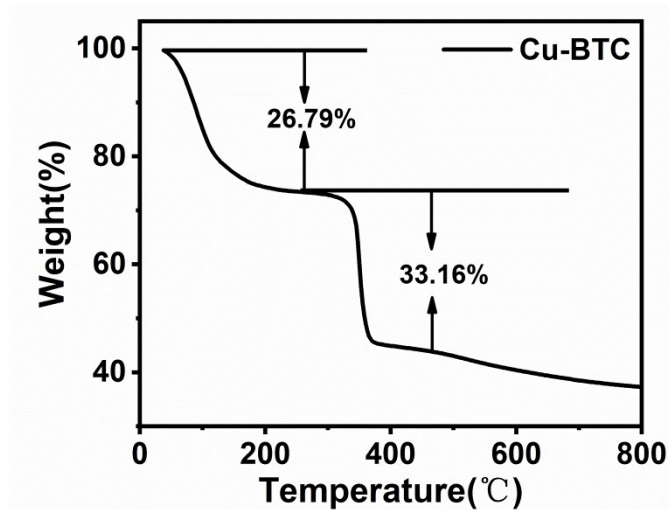

Figure S2. TGA curves of Cu-BTC precursor under  $N_2$ .

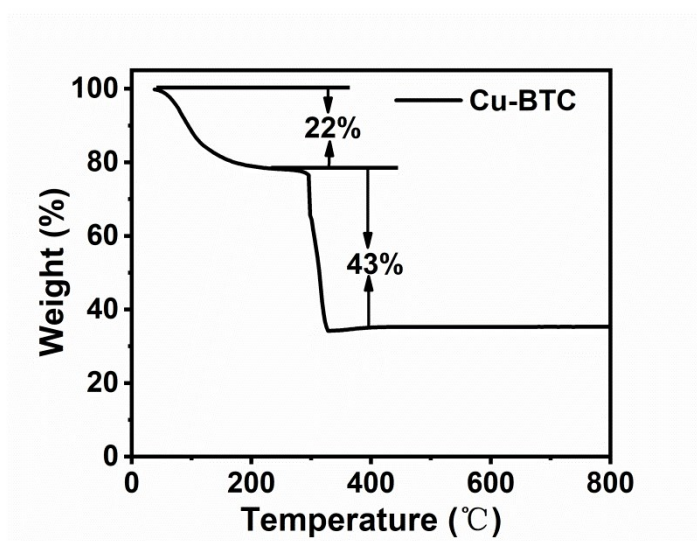

Figure S3. TGA curves of Cu-BTC in air.

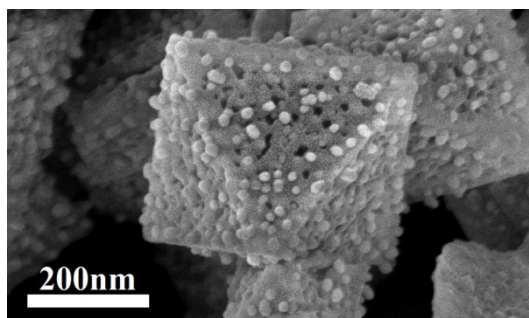

**Figure S4.** SEM image of Cu@C obtained at 600 °C in N<sub>2</sub>.

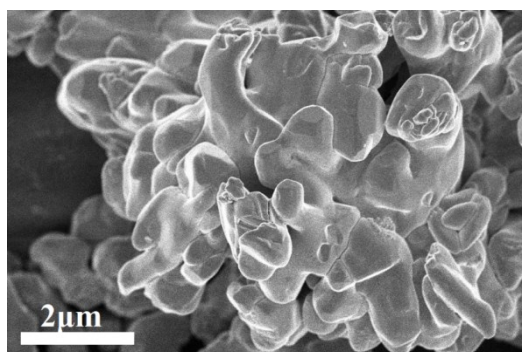

**Figure S5.** SEM image of CuO.

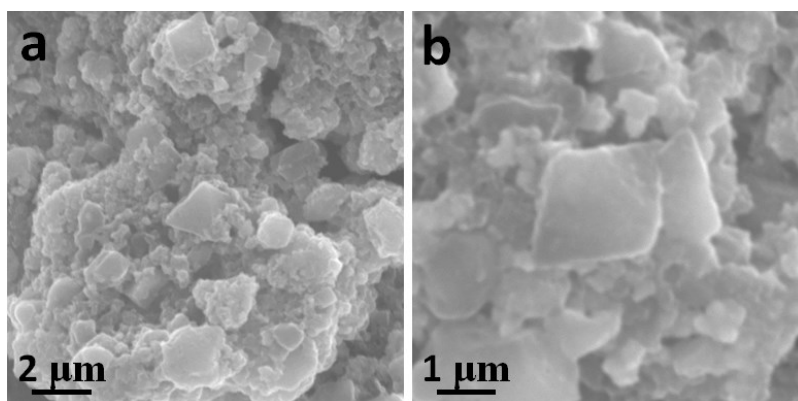

**Figure S6.** SEM images of the electrode material after 100 cycles at 100 mA g<sup>-1</sup>.
